# Supplementary material for: Intrinsic suppression of type I interferon production underlies the therapeutic efficacy of IL-15-producing natural killer cells in B-cell acute lymphoblastic leukemia
Source: PubMed Central journal article supplement — J Immunother Cancer. 2023 May 22;11(5):e006649. doi: 10.1136/jitc-2022-006649 (PMC10231005; doi:10.1136/jitc-2022-006649), 2023-05-22
Supplement: jitc-2022-006649supp001.pdf [file jitc-2022-006649supp001.pdf]

**Kumar et al., Supplementary Information**

**Intrinsic suppression of type I interferon production underlies the therapeutic efficacy of IL-15-producing natural killer cells in B-cell acute lymphoblastic leukemia**

Supplementary Figures 1-15

Supplementary Tables 1-5

**Figure S1:** *Concomitant high expression of IFN-I production and IFN-I signaling/response transcripts predicts favorable clinical prognosis in patients with B-ALL.*

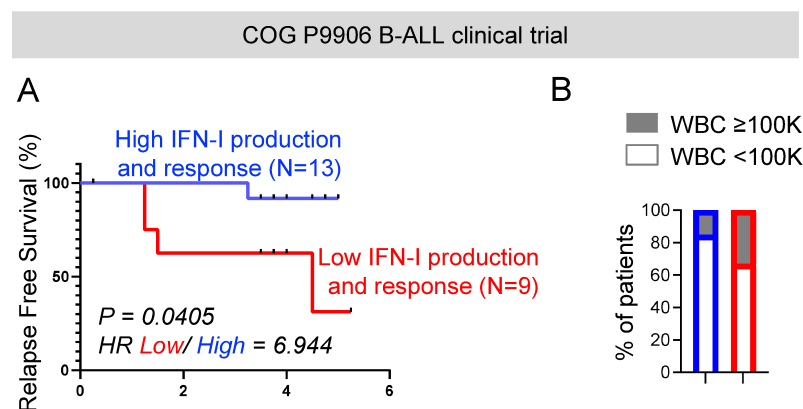

High IFN-I production and response = CD123<sup>high</sup> IRF7<sup>high</sup> IFNAR1<sup>High</sup> IFNAR2<sup>High</sup> STAT1<sup>High</sup> OAS1<sup>High</sup> MX1<sup>High</sup>  
 Low IFN-I production and response = CD123<sup>Low</sup> IRF7<sup>Low</sup> IFNAR1<sup>Low</sup> IFNAR2<sup>Low</sup> STAT1<sup>Low</sup> OAS1<sup>Low</sup> MX1<sup>Low</sup>

**Figure S1: Concomitant high expression of IFN-I production and IFN-I signaling/response transcripts predicts favorable clinical prognosis in patients with B-ALL.** (A) Comparison of survival probabilities of COG P9906 B-ALL patients separated into 2 groups based on the median transcript expressions of IFN-I production (CD123 and IRF7) and IFN-I signaling/ response (IFNAR1, IFNAR2, STAT1, OAS1, MX1) genes as ‘High IFN-I production and response’ (n=13) and ‘Low IFN-I production and response’ (n=9). (B) Stacked bar charts comparing the proportions of COG P9906 B-ALL patients with WBC count  $\geq$  100 000 or WBC count < 100 000 within the ‘High IFN-I production and response’ and ‘Low IFN-I production and response’ cohorts. Survival was calculated by Kaplan-Meier method. p-value was calculated by the log-rank test. HR = Hazard ratio.

**Figure S2:** Gating strategy for flow cytometry analysis of human PBMCs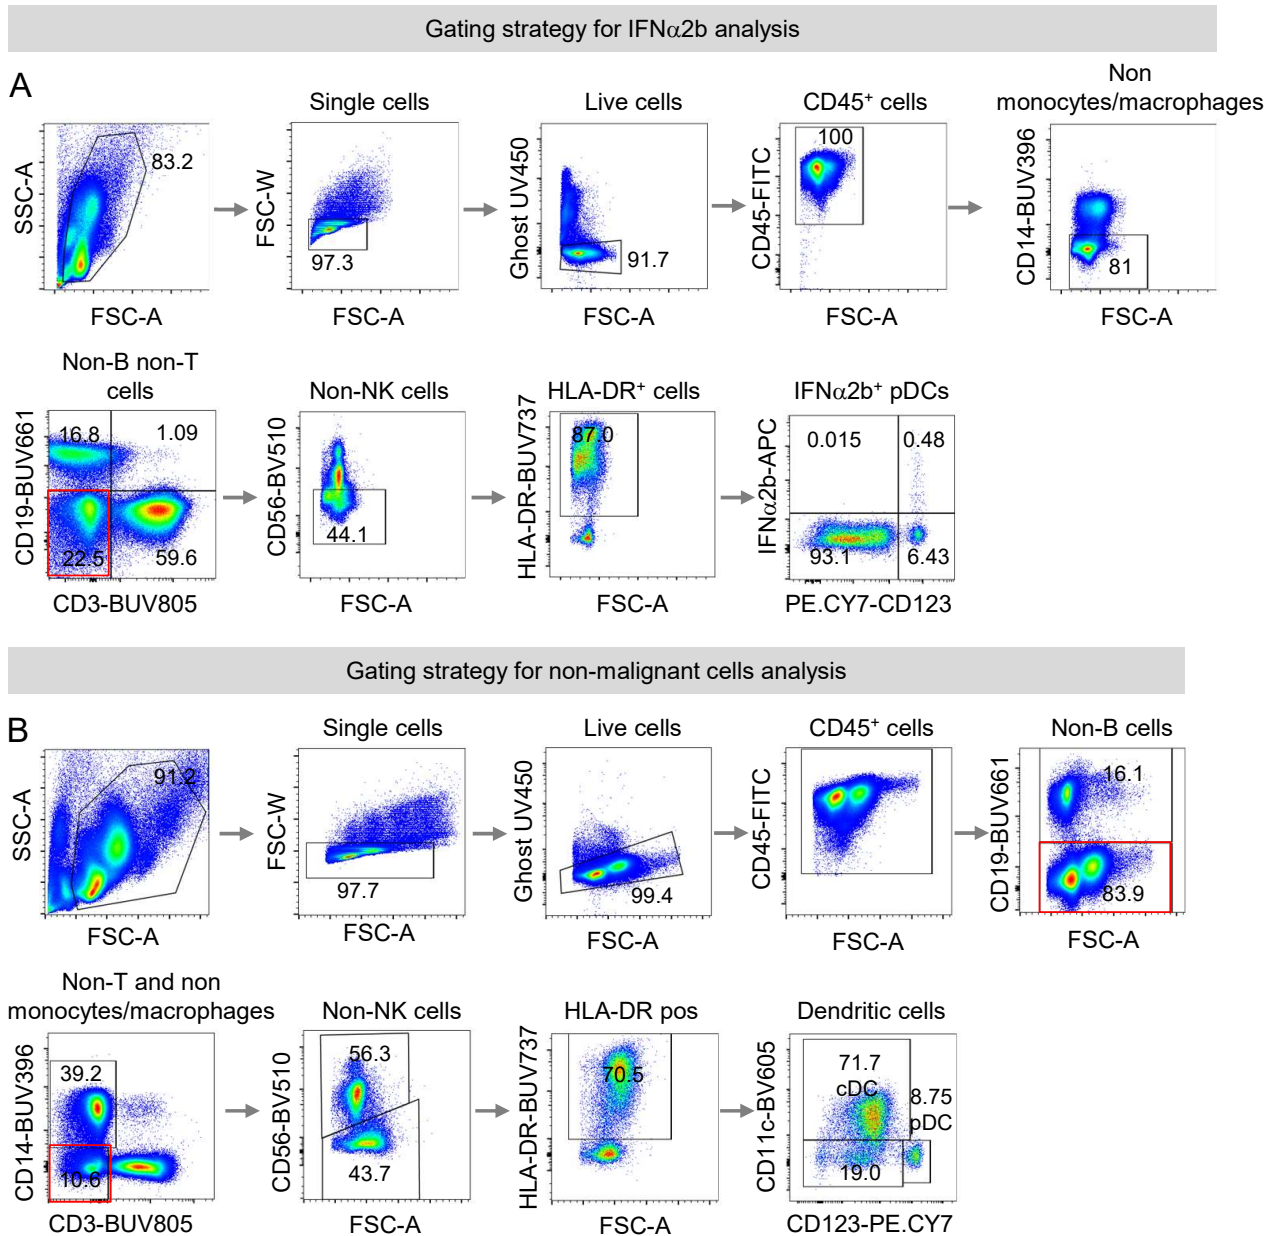

**Figure S2: Gating strategy for flow cytometry analysis of human PBMCs. (A)** For analysis of IFN $\alpha$ 2b-expressing immune cells, lymphocytes were gated based on forward and side scatter of the cells followed by gating of singlets and selection of live cells as Ghost-UV450<sup>-</sup> and leucocytes as CD45<sup>+</sup> cell fraction. Monocytes were then gated out (CD14<sup>-</sup> gate), followed by selection of non-B and non-T cells (CD19<sup>-</sup> CD3<sup>-</sup>) and non-NK cells (CD56<sup>-</sup>). HLA-DR<sup>+</sup> cells within the ‘non-B, non-T, non-monocyte, and non-NK’ fraction were analyzed for IFN $\alpha$ 2b expression. **(B)** For calculating frequencies of DC subsets within the non-leukemic immune cell fraction (CD19<sup>-</sup>), live leucocytes were selected as in (A) followed by selection of CD19<sup>-</sup> immune cells. Then HLA-DR<sup>+</sup> cells were selected within non-monocytes, non-T, and non-NK cells and frequencies of cDCs, pDCs, and non-cDC/non-pDC were analyzed.

**Figure S3:** Reduction in frequencies of IFN-Is producers (pDC) in the BM of B-ALL patients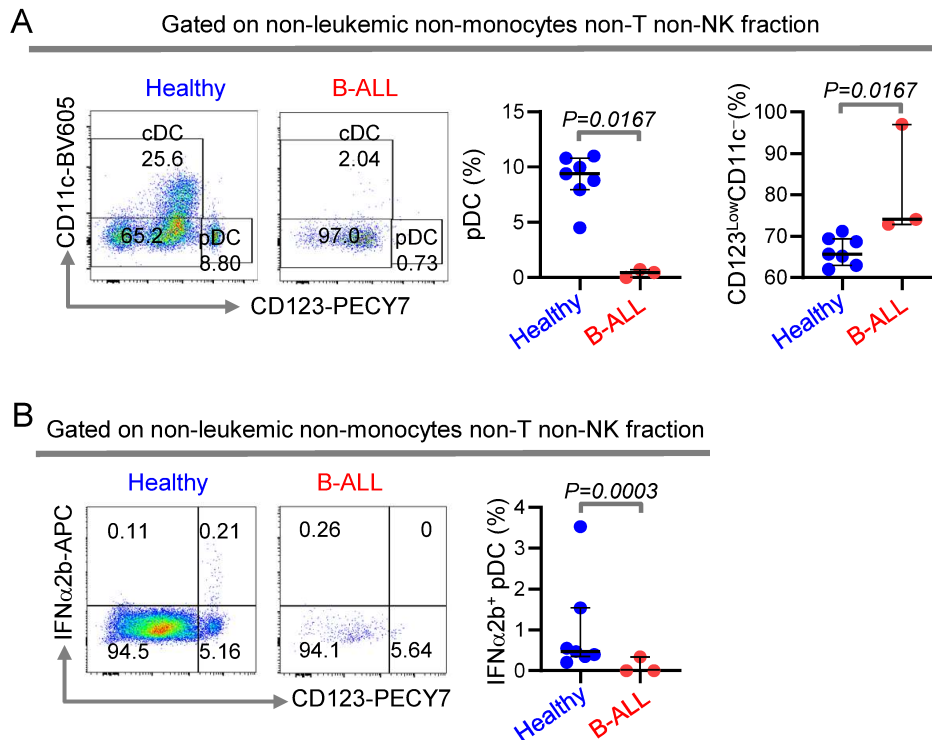

**Figure S3: Reduction in frequencies of IFN-Is producers (pDC) in the BM of B-ALL patients (A)** Comparison of bone marrow pDC frequencies within the non-B, non-monocytes, non-T, non-NK, and HLA-DR<sup>+</sup> immune cell fractions between B-ALL patients (n=3) and healthy donors (n=7) by flow cytometry. **(B)** Comparison of IFN $\alpha$ 2b<sup>+</sup> cells within the HLA-DR<sup>+</sup> non-B, non-T, non-monocytes, and non-NK immune cell fraction of BMMC after stimulation with class C CpG ODN between B-ALL patients (n=3) and healthy donors (n=7) by flow cytometry. All pairwise comparisons between any two groups were conducted using the Mann-Whitney U test. Exact p-values are provided whenever significant (<0.05) or trending to significance (0.05<p<0.1).

**Figure S4:** Gating strategy for CyTOF analysis of T-cell subsets in PBMC.

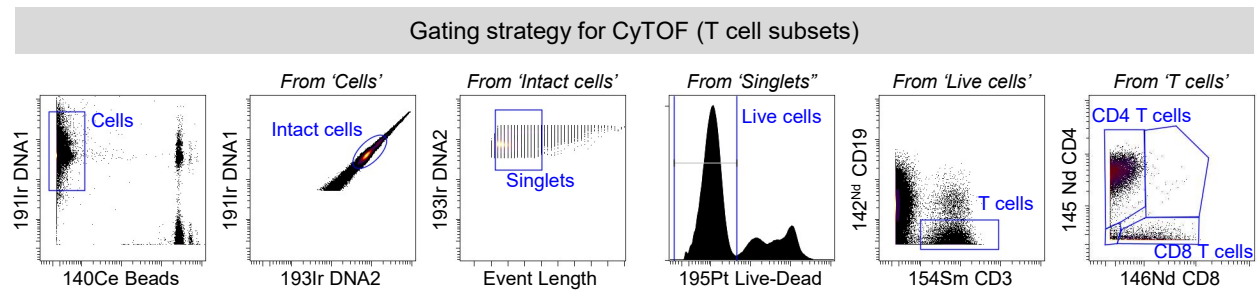

**Figure S4: Gating strategy for CyTOF analysis of T-cell subsets in PBMC.** From live intact singlet populations,  $CD3^+CD19^-$  cells were selected to get the non-leukemic fraction and analyzed for the frequencies of  $CD4^+$  and  $CD8^+$  cells.

**Figure S5:** *HLA-DR expression is reduced on leukemic B cells compared to their healthy counterparts.*

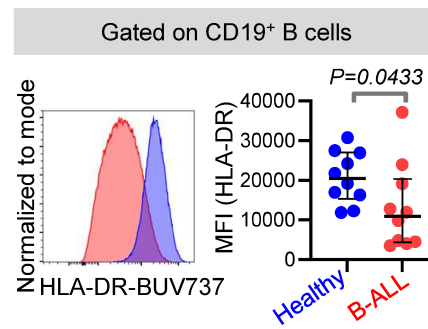

**Figure S5: HLA-DR expression is reduced on leukemic B cells compared to their healthy counterparts.** Representative histogram overlay and dot plots depicting median fluorescence intensity of HLA-DR expression on B cells of B-ALL patients (n=10) and healthy donors (n=10).

**Figure S6:** *Magnetic sorting of leukemic (B-cell) and non-leukemic (non-B) cell fractions from mouse splenic WBCs*

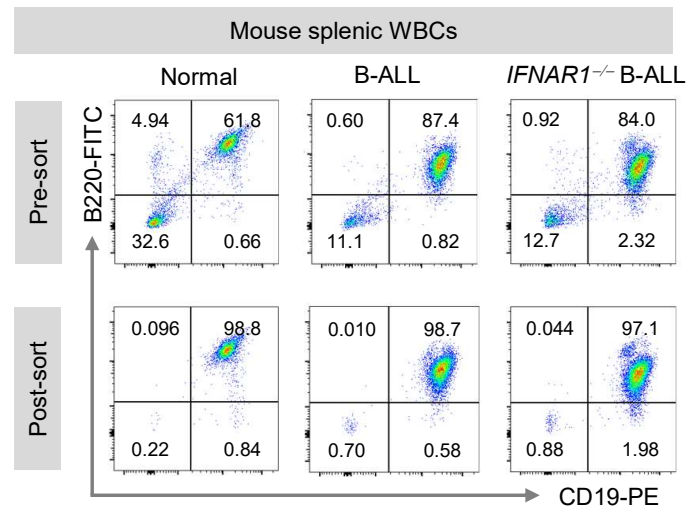

**Figure S6: Magnetic sorting of leukemic (B-cell) and non-leukemic (non-B) cell fractions from mouse splenic WBCs.** Representative flow cytometry plots showing the pre-sort and post-sort purity of murine splenic B-cell fractions from healthy, *Eμ-MYC* B-ALL-bearing, and *IFNAR1*<sup>-/-</sup> *Eμ-MYC* B-ALL-bearing mice after magnetic-activated cell sorting.

**Figure S7:** Production of IFN $\beta$  is suppressed in bone marrow during primary B-cell leukemogenesis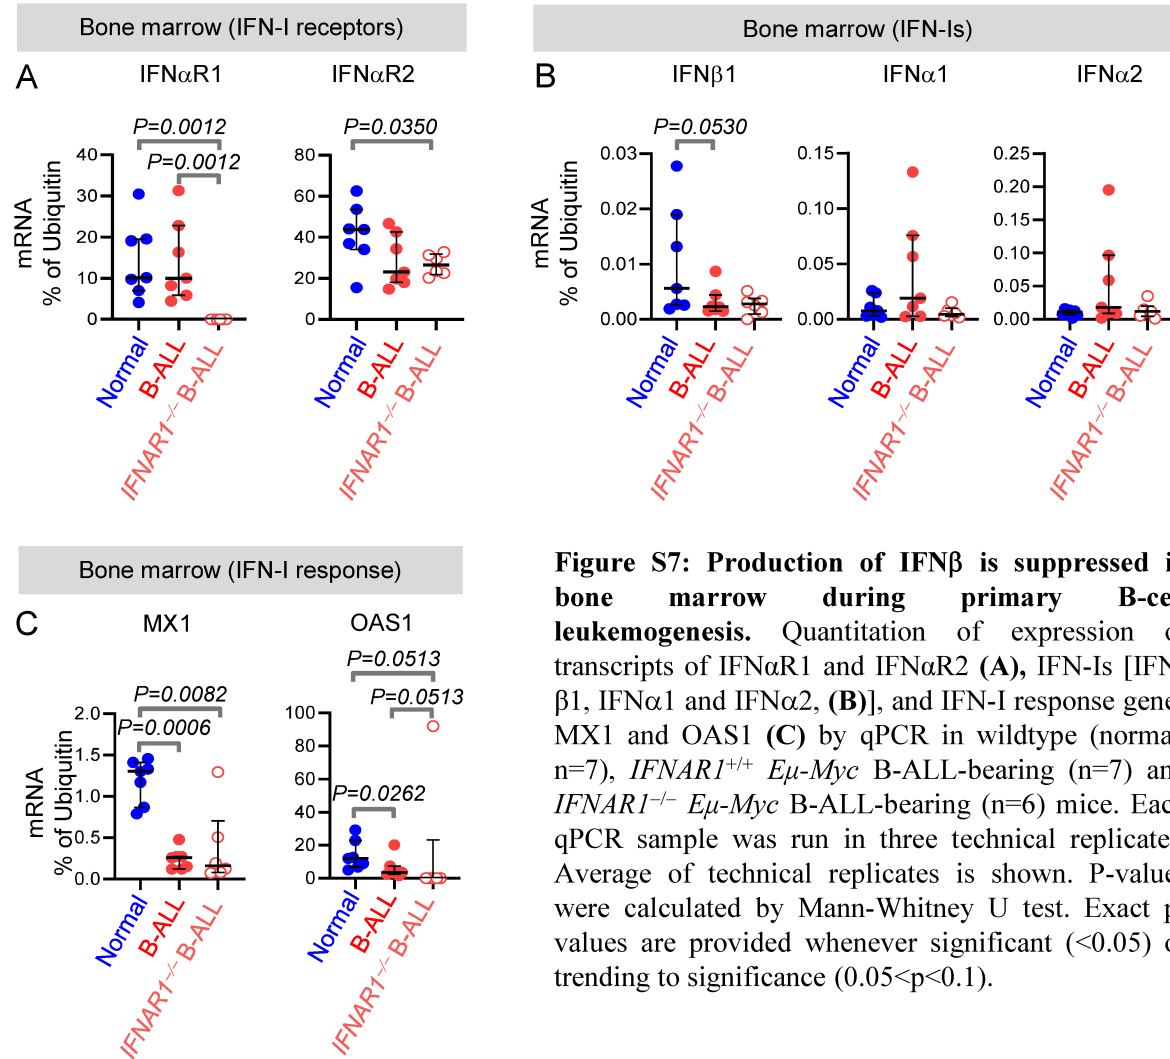



**Figure S8:** *IFN-I response is suppressed in leukemic and non-leukemic fractions during primary B-ALL development*

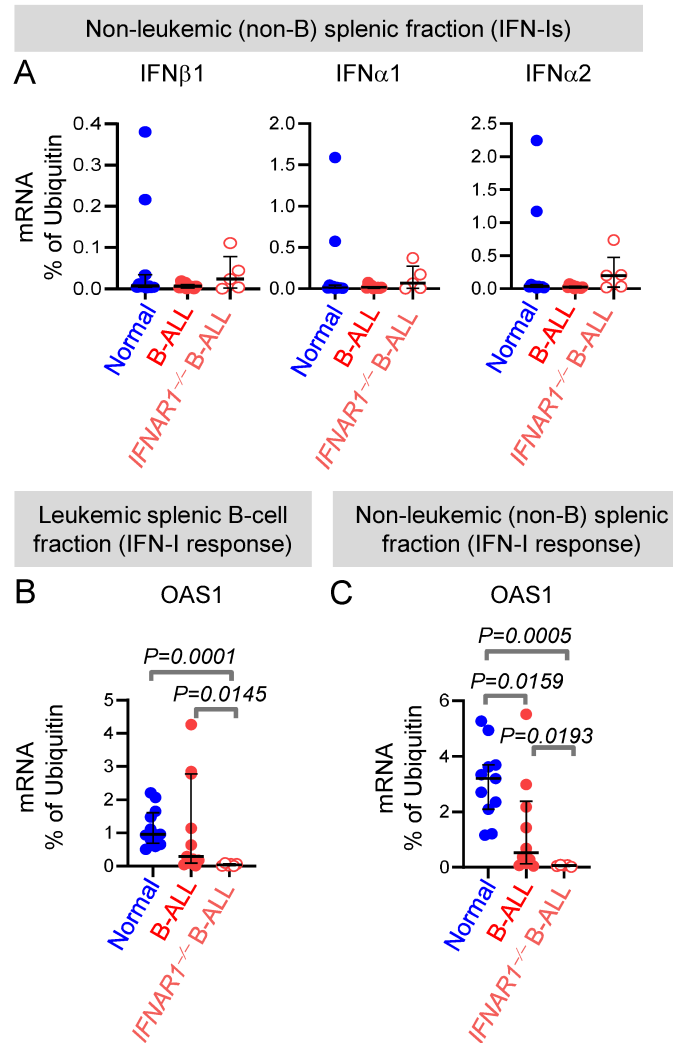

**Figure S8: IFN-I response is suppressed in leukemic and non-leukemic fractions during primary B-ALL development.** (A) qPCR quantitation of transcripts of IFN $\beta$ 1, IFN $\alpha$ 1, and IFN $\alpha$ 2 in splenic non-B cell fraction of wildtype (normal, n=7), *IFNAR1*<sup>+/+</sup> *E $\mu$ -Myc* B-ALL-bearing (spleen, n=10) and *IFNAR1*<sup>-/-</sup> *E $\mu$ -Myc* B-ALL-bearing (n=5) mice. (B-C) qPCR quantitation of transcripts of OAS1 in leukemic (B) and non-leukemic (C) fractions of the spleen of wildtype (normal, n=12), *IFNAR1*<sup>+/+</sup> *E $\mu$ -Myc* B-ALL-bearing (n=11) and *IFNAR1*<sup>-/-</sup> *E $\mu$ -Myc* B-ALL-bearing (n=6) mice. P-values were calculated using Mann-Whitney U test. Exact p-values are provided whenever significant (<0.05) or trending to significance (0.05<p<0.1).

**Figure S9:** Gating strategy for flow cytometry analysis of mouse immune cells.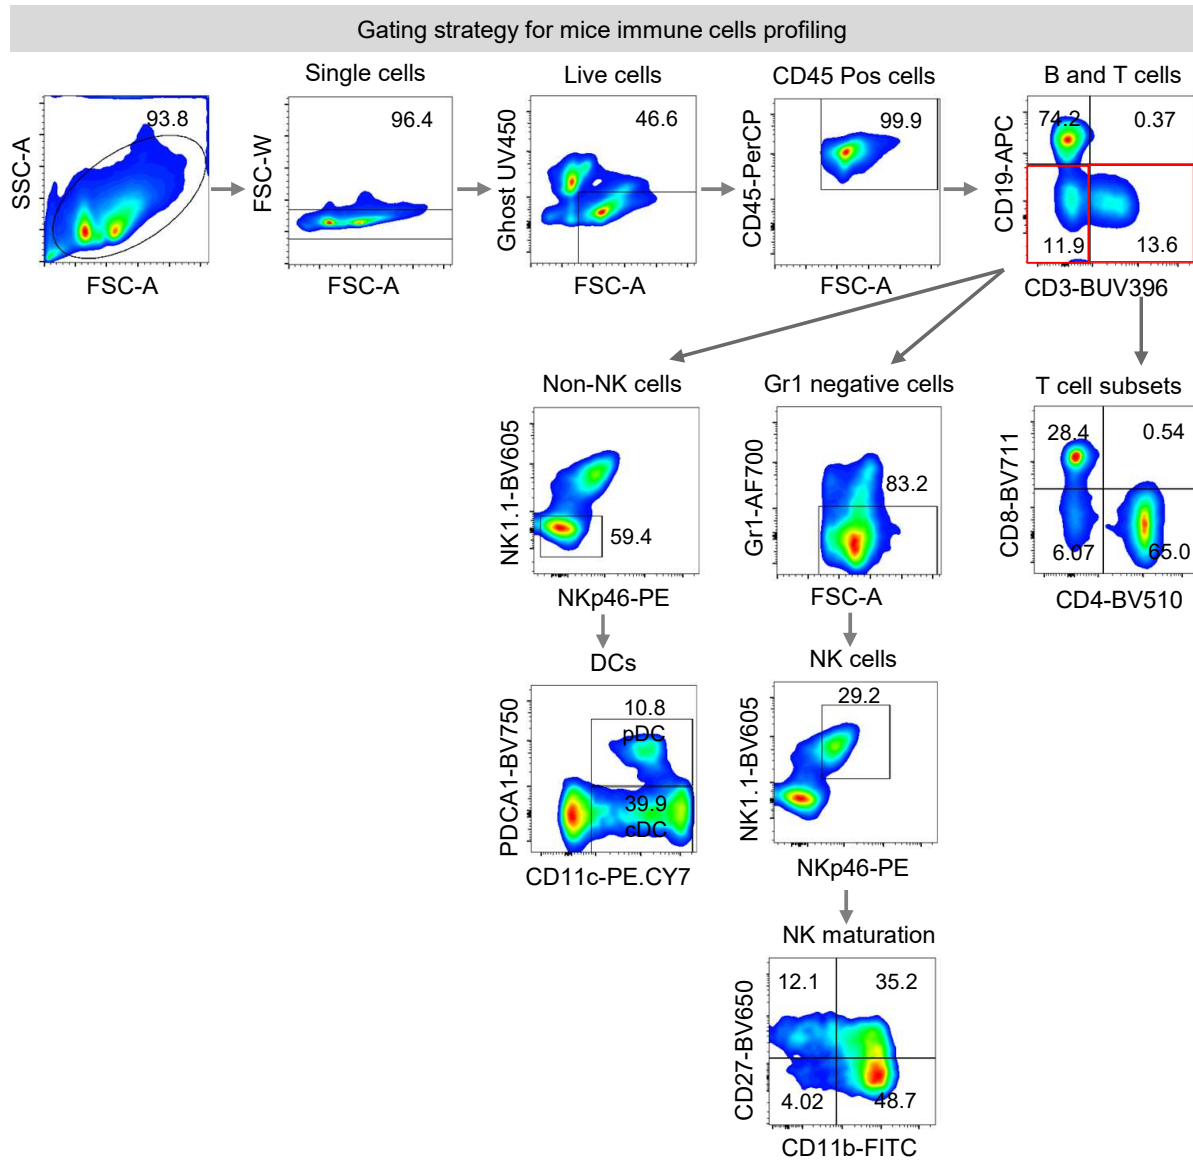

**Figure S9: Gating strategy for flow cytometry analysis of mouse immune cells.** From the lymphocytes cluster, singlets were gated followed by selection of live cells as Ghost-UV450<sup>-</sup> and leucocytes as CD45<sup>+</sup> cell fraction. T-cell subsets were analyzed from CD19<sup>-</sup>CD3<sup>+</sup> cells. After the selection of non-B (non-leukemic) and non-T cells, NK cells were analyzed after gating on Gr1<sup>-</sup> fraction. cDCs and pDCs were analyzed from the non-NK fraction.

**Figure S10:** Ablation of *IFNAR1* does not exacerbate suppression of splenic T and DC subsets.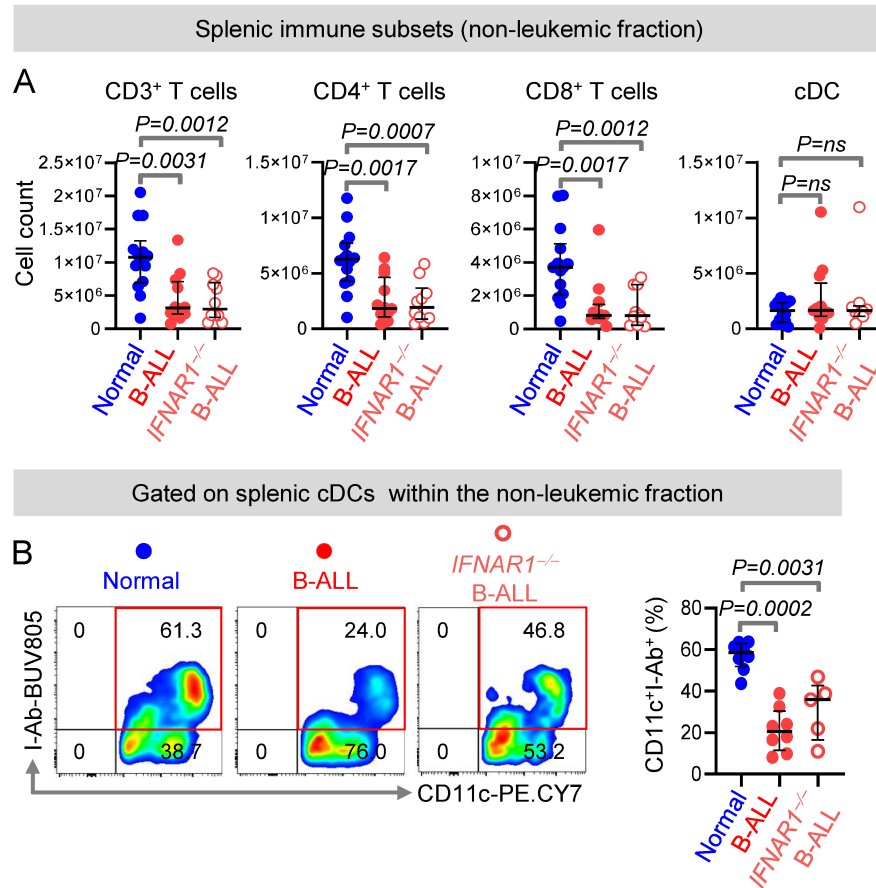

**Figure S10: Ablation of *IFNAR1* does not exacerbate suppression of splenic T and DC subsets.** (A) Comparison of pan T cells, T-cell subsets, and cDC counts in the non-leukemic fraction of the spleen of normal (n=14), *IFNAR1*<sup>+/+</sup> *Eμ-Myc* B-ALL-bearing (n=12) and *IFNAR1*<sup>-/-</sup> *Eμ-Myc* B-ALL-bearing (n=10;) mice. (B) Flow cytometry measurement of frequencies of I-Ab<sup>+</sup> cells within pan DC (CD11c<sup>+</sup>) cells in the non-B, non-T, and non-NK cell fraction of the spleen of normal (n=8), *IFNAR1*<sup>+/+</sup> *Eμ-Myc* B-ALL-bearing (n=8), and *IFNAR1*<sup>-/-</sup> *Eμ-Myc* B-ALL-bearing (n=5) mice. P-values were calculated using Mann-Whitney U test. Exact p-values are provided whenever significant (<0.05) or trending to significance (0.05<p<0.1). ns = not significant.

**Figure S11:** Bone marrow T-cell subsets are reduced only upon by *IFNAR1* ablation during primary B-ALL development

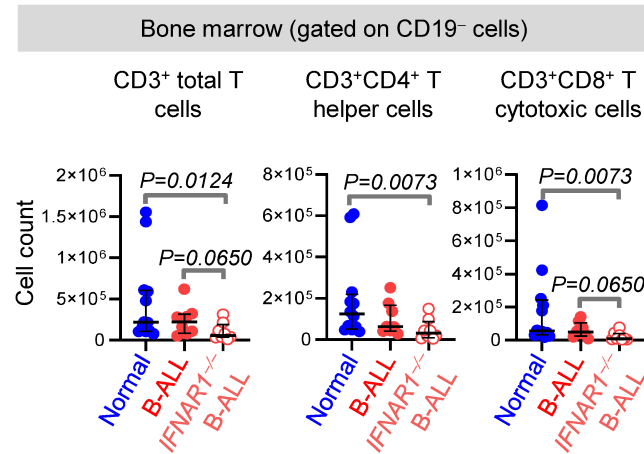

**Figure S11: Bone marrow T-cell subsets are reduced only upon *IFNAR1* ablation during primary B-ALL development.** Comparison of pan T cells and T-cell subsets in the non-leukemic fraction of the bone marrow of normal (n=12), *IFNAR1*<sup>+/+</sup> *Eμ-Myc* B-ALL-bearing (n=8), and *IFNAR1*<sup>-/-</sup> *Eμ-Myc* B-ALL-bearing (n=8) mice. Comparisons were conducted using Mann-Whitney U test. Exact p-values are provided whenever significant (<0.05) or trending to significance (0.05<p<0.1).

**Figure S12:** Purity of sorted mouse splenic NK cells used for NK adoptive transfer into ALL-bearing mice

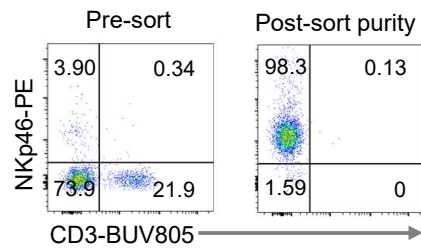

**Figure S12: Purity of sorted mouse splenic NK cells used for NK adoptive transfer into ALL-bearing mice.** Representative flow cytometry plots showing the pre-sort and post-sort purity of murine splenic NK cells isolated from normal syngeneic mice using magnetic-activated cell sorting.

**Figure S13:** *IFN-Is drive NK surveillance and reduce progression of B-ALL*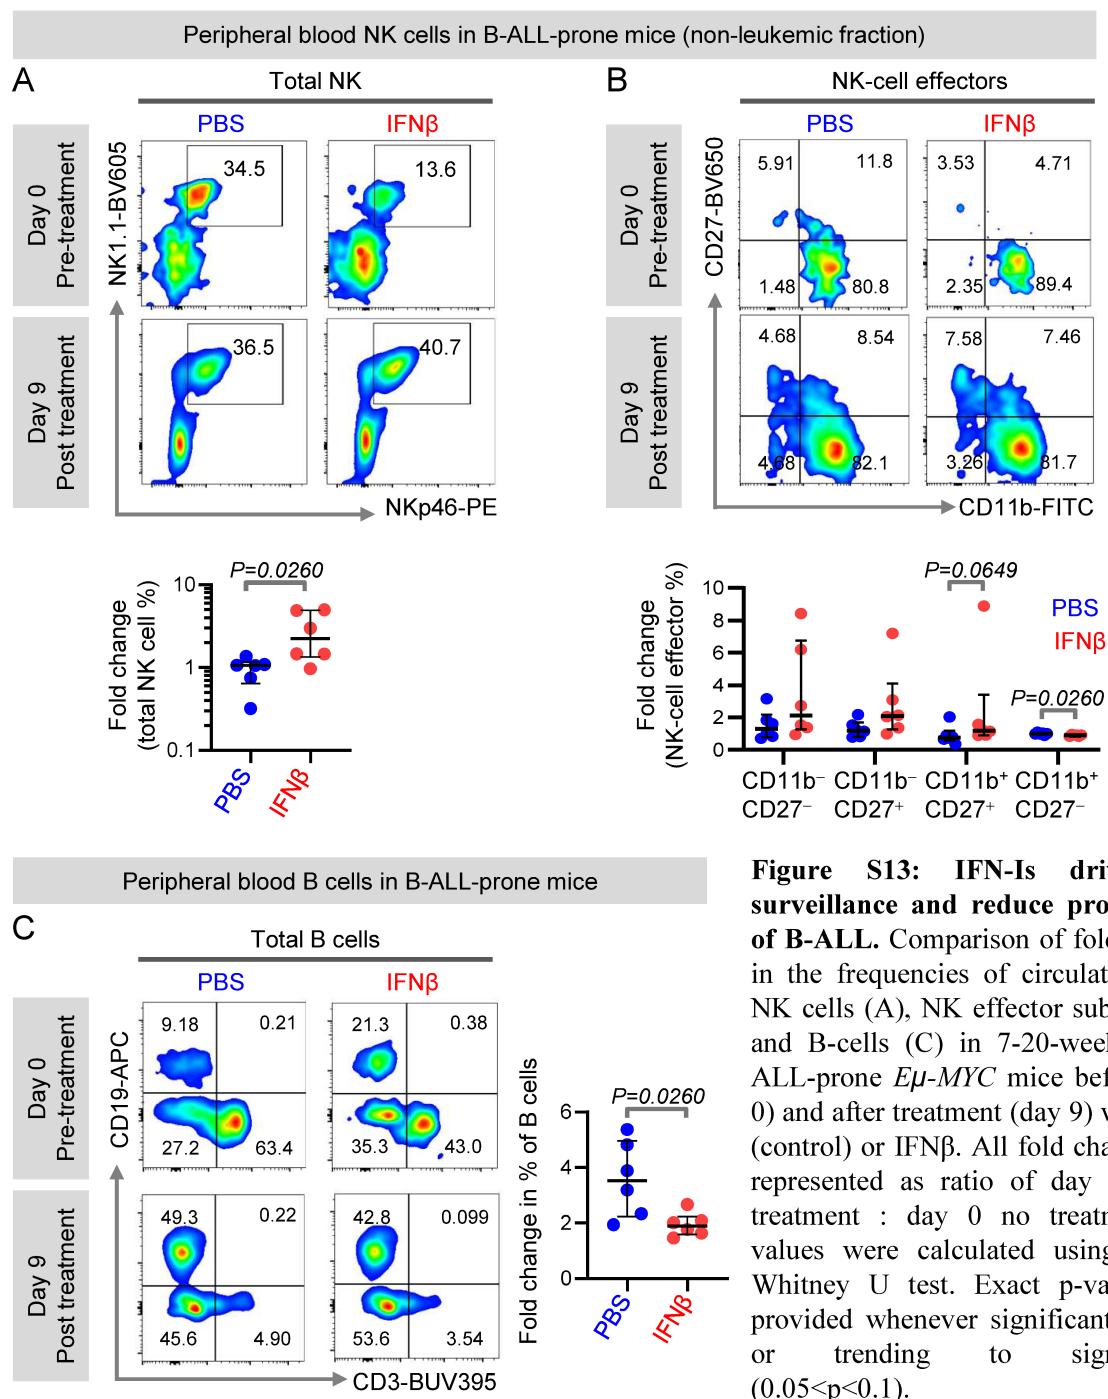

**Figure S14:** CRISPRa-engineered IL-15 NK cells are not toxic to healthy donor PBMC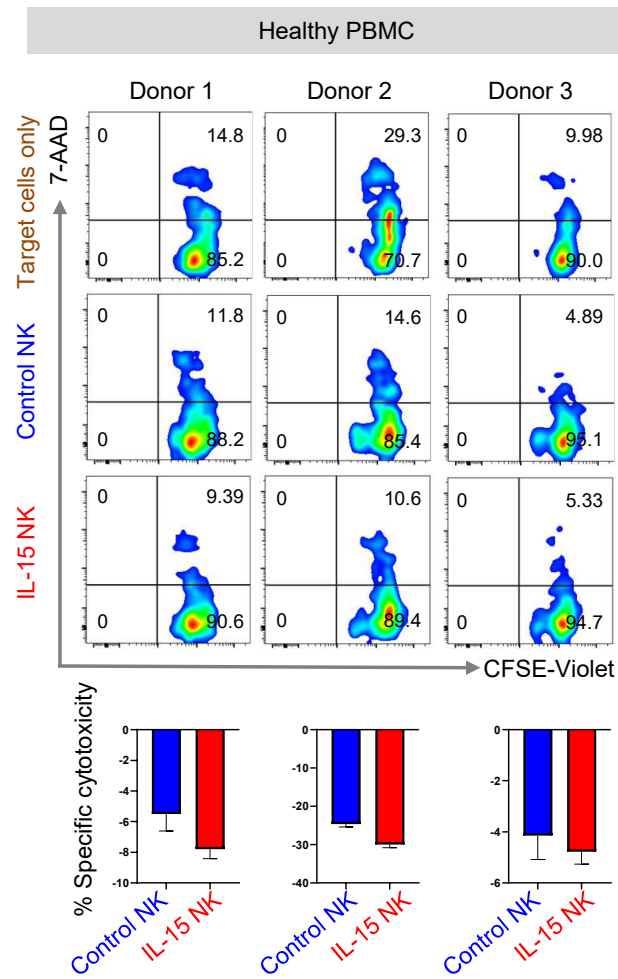

**Figure S14: CRISPRa-engineered IL-15 NK cells are not toxic to healthy donor PBMC.** Flow cytometry to compare specific cytotoxicity of dCas9-VP64-GFP<sup>+</sup> NK-92 cells transduced with control sgRNA-RFP (Control NK) or IL-15 sgRNA-RFP (IL-15 NK) against three independent healthy donor PBMC target cells. Effector: Target = 10:1. Comparisons were conducted using Student's t-test. Exact p-values are provided whenever significant (<0.05) or trending to significance (0.05<p<0.1).

**Figure S15:** *Inactivation of MYC restores autocrine IFN-I production and signaling in malignant human B cells*

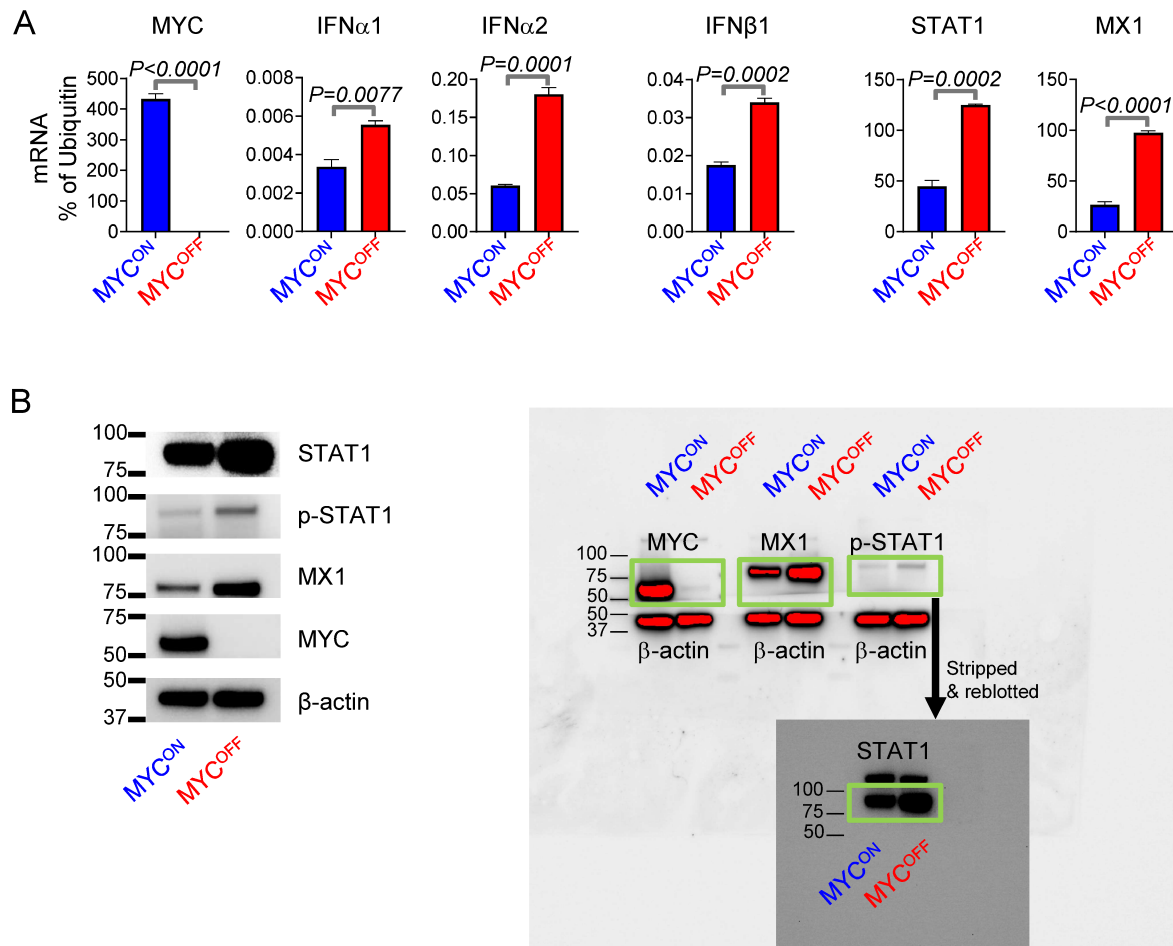

**Figure S15: Inactivation of MYC restores autocrine IFN-I production and signaling in malignant human B cells.** (A) Quantitation of expression of transcripts of MYC, IFN $\alpha$ 1, IFN $\alpha$ 2, IFN $\beta$ 1, STAT1, and MX1 in MYC-overexpressing (MYC<sup>ON</sup>) and MYC-inactivated (MYC<sup>OFF</sup>) P493-6 malignant human B-cell line. Each qPCR sample was run in three technical replicates. The average of technical replicates is shown. P-values are calculated by unpaired t-test. Exact p-values are provided whenever significant ( $<0.05$ ) or trending to significance ( $0.05 < p < 0.1$ ). (B) Immunoblotting showing increase in global STAT1, p-STAT1, and MX1 after MYC inactivation in P493-6 cells (*left*). Full scan of blot (*right*).



**Table S1:** List of B-ALL patient samples used in the study

| Patient ID       | Age | Sex | Tissue Type | Cytogenetics                                                                                                                                                                                 | Translocation /Mutation status          | Disease status | Source       | Percentage of total IFN $\alpha$ 2b <sup>+</sup> cells |
|------------------|-----|-----|-------------|----------------------------------------------------------------------------------------------------------------------------------------------------------------------------------------------|-----------------------------------------|----------------|--------------|--------------------------------------------------------|
| 18067-HTB18-029  | 57  | F   | PBMC        | Unknown                                                                                                                                                                                      | JAK2(G); JAK2(S) (Ph-like)              | Diagnosis      | City of Hope | 0                                                      |
| 18067-HTB19-1382 | 24  | M   | PBMC        | Normal                                                                                                                                                                                       | EZH2; ETV6; KMT2D                       | Diagnosis      | City of Hope | 0                                                      |
| 18067-LTB18-578  | 44  | F   | PBMC        | Normal                                                                                                                                                                                       | KMT2D                                   | Diagnosis      | City of Hope | 0.025                                                  |
| 18067-HTB19-048  | 20  | F   | PBMC        | 47,XX,+22[6]                                                                                                                                                                                 | JAK2; JAK1 (Ph-like)                    | Diagnosis      | City of Hope | 0.055                                                  |
| 18067-HTB19-937  | 41  | F   | PBMC        | 46,XX[16].ish t(X;14)(p22.33;q32.33)(5'IGH+;3'IGH+)[2]                                                                                                                                       | IKZF1; JAK2(G); JAK2(S); PAX5 (Ph-like) | Diagnosis      | City of Hope | 0                                                      |
| 18067-HTB19-376  | 30  | F   | PBMC        | Unknown                                                                                                                                                                                      | KMT2D                                   | Diagnosis      | City of Hope | 0.028                                                  |
| 18067-HTB19-289  | 43  | F   | PBMC        | 47,XX,-2,t(3;15)(p23;q15), del(5)(q22q3?3), del(7)(p13p15), +del(9)(p21.2), der(9)del(9)(p13p22)del(9)(q22)x2, der(10)t(2;10)(q21;q26), del(12)(p11.2p13.3), add(17)(q25)x2,-20,+21,+mar[17] | KRAS; KMT2D; PAX5                       | Diagnosis      | City of Hope | 0.04                                                   |
| 18067-LTB18-544  | 24  | M   | PBMC        | 47,XY,+X[6]                                                                                                                                                                                  | JAK2(G); JAK2(S) (Ph-like)              | Diagnosis      | City of Hope | 0.014                                                  |
| 18067-HTB19-1420 | 54  | F   | PBMC        | 46,XX,t(9;22)(q34.1;q11.2)[6];48,sl,+4,-16,+21,der(22)t(9;22) add(9)(q34.3),+der(22)t(9;22) add(9)[11] 47,sd1,t(5;12)(q33;q13),-21[3]                                                        | KMT2C                                   | Diagnosis      | City of Hope | 0.015                                                  |

|                  |    |         |          |                                                                                                                                                           |                             |            |                            |       |
|------------------|----|---------|----------|-----------------------------------------------------------------------------------------------------------------------------------------------------------|-----------------------------|------------|----------------------------|-------|
| 18067-HTB19-1424 | 25 | Unknown | PBMC     | 46,XY,+X,der(1)dup(q42q12)?del(1)(q42q44),del(5)(q22q31),-7,t(8;9)(p21;q22),t(10;22)(p13;q13)[19]                                                         | KMT2D; NRAS; PAX 5          | Diagnosis  | City of Hope               | 0.012 |
| 65               | 33 | F       | Pheresis | 47 - 48, xx, -4-11, +3-4 probable t(4;11)                                                                                                                 | t(4;11) KMT2A translocation | Diagnosis  | University of Pennsylvania |       |
| 779              | 48 | F       | PBMC     | 46,XX,t(1;11)(p32;q23)[10]/48,idem,+X,+21[10]/FISH FOR MLL SPLIT POS 163/200 CELLS/FISH FOR BCR-ABL NEG 200 CELLS                                         | t(1;11) KMT2A translocation | Diagnosis  | University of Pennsylvania |       |
| 2142             | 30 | M       | Pheresis | 46,XY,del(9)(p21p21)[6]/46,XY[24]                                                                                                                         | Ph-like                     | Diagnosis  | University of Pennsylvania |       |
| 3113             | 44 | F       | PBMC     | Unknown                                                                                                                                                   | KMT2A/AF1                   | Diagnosis  | University of Pennsylvania |       |
| 4986             | 41 | M       | PBMC     | 46,XY[5]                                                                                                                                                  | Ph-like                     | Diagnosis  | University of Pennsylvania |       |
| 4988             | 61 | F       | PBMC     | 46,XX,del(7)(p11.2)[7]/46,XX[13]                                                                                                                          | Ph-like                     | Refractory | University of Pennsylvania |       |
| 18067-HTB19-1191 | 40 | F       | BMMC     | 50,XX,-2,add(3)(q27.3),+6,i(6)(p10),-10,+12,del(12)(q24.1),t(14;18)(q32.33;q21.33),+der(14)t(14;18),+17,+2mar[20].ish der(2)t(2;8)(q37;q24.21)(3'MYC+)[2] | KMT2D; PTMA-MYC             | Diagnosis  | City of Hope               | 0.012 |
| 18067-HTB19-525  | 66 | M       | BMMC     | 35,X,-Y,-3,-7,-8,-9,-13,-14,-15,-16,-17,-22[11]; Sideline 1: 35,sl,add(18)(p11.2),del(20)(q13.1q13.3)[4];                                                 | MLL2; TP53                  | Diagnosis  | City of Hope               | 0.02  |
| 18067-HTB19-1130 | 24 | Unknown | BMMC     | 47,X,-Y,t(4;11)(q21;q23.3),+6,del(7)(p11.2),+i(7)(q10),?add(21)(p11.2)[14]                                                                                | KMT2A                       | Diagnosis  | City of Hope               | 0     |
| 18067-HTB19-054  | 21 | F       | BMMC     | 47,XX,+22[6]                                                                                                                                              | Jak2; Jak1                  | Diagnosis  | City of Hope               | 0.069 |
| 18067-HTB1-004   | 48 | M       | BMMC     | 47,XY,+X,del(6)(q21q25),der(7)t(7;8)(p13;q22),i(17)(q10),5~11dmin.ish t(Y;14)(p11.3;q32.33)(5'IGH+;3'IGH                                                  | TP53                        | Diagnosis  | City of Hope               | 0.058 |

|                  |    |   |      |                                                                                                                                                                                                                                                              |                          |           |              |       |
|------------------|----|---|------|--------------------------------------------------------------------------------------------------------------------------------------------------------------------------------------------------------------------------------------------------------------|--------------------------|-----------|--------------|-------|
|                  |    |   |      | +) [3]<br>Sideline: 47,sl,del(10)(q22q26) [3]<br>Nonclonal aberrations of Sideline:<br>add(X)(p22.1), add(X)(q24), add(5)(p11.2), del(8)(q11.2), add(7)(p11.2), +10, add(17)(p11.2)                                                                          |                          |           |              |       |
| 18067-HTB22-0100 | 37 | F | BMMC | 46,XX,t(4;11;19)(q21;q23.3;q13.1) [13]<br>Sideline 1: 46,sl,i(7)(q10) [4]<br>Sideline 2: 47,sdl1,+21 [3]<br>Nonclonal Aberrations of Stemline and Sidelines: t(1;3)(p36.1;p21), t(1;6)(p36.1;q23), t(1;18)(p13;q11.2), add(2)(p13), add(3)(p13), add(6)(q21) | KMT2A, TP53, WHSC1       | Diagnosis | City of Hope | 0.012 |
| 18067-HTB22-0386 | 39 | F | BMMC | 38,XX,-2,-3,-4,del(5)(q22q33),-7,del(7)(q22q26), der(8)del(8)(p21)del(8)(q11.2q21.2), add(9)(p13), der(10)t(10;?12)(q26;q13),-12,-13,-15,-16,?der(17)t(12;17)(p1?1.2;q?21), der(21)t(3;21)(p21;q22.3) [cp5]                                                  | EP300, MUTYH, PAX5, TP53 | Diagnosis | City of Hope | 0.38  |

**Table S2:** Reagents and antibodies used for flow cytometry

| Name                                                       | Fluorophore     | Clone      | Dilution/<br>Concentration | Source                  |
|------------------------------------------------------------|-----------------|------------|----------------------------|-------------------------|
| Anti-human CD45                                            | FITC            | 2D1        | 1:100                      | Biolegend               |
| Anti-human CD3                                             | BUV805          | UCHT1      | 1:100                      | BD                      |
| Anti-human CD19                                            | BUV661          | HIB19      | 1:100                      | BD                      |
| Anti-human CD14                                            | BUV395          | M5E2       | 1:100                      | BD                      |
| Anti-human CD56                                            | BV510           | NCAM16.2   | 1:100                      | BD                      |
| Anti-human CD16                                            | BV711           | 3G8        | 1:100                      | BD                      |
| Anti-human HLA-DR                                          | BUV737          | G-46-6     | 1:100                      | BD                      |
| Anti-human CD11c                                           | BV605           | 3.9        | 1:100                      | BD                      |
| Anti-human CD123                                           | PE/Cy7          | 6H6        | 1:100                      | BD                      |
| Anti-human IFN- $\alpha$ 2b                                | APC             | 7N4-1      | 1:100                      | BD                      |
| Anti-human CXCR4                                           | PECY5           | 12G5       | 1:100                      | Biolegend               |
| Anti-pSTAT1 (pY701)                                        | PE              | 4 $\alpha$ | 10:100                     | BD                      |
| Anti-mouse CD45                                            | PerCP           | 30-F11     | 1:100                      | Biolegend               |
| Anti-mouse CD19                                            | APC             | 1D3        | 1:100                      | BD                      |
| Anti-mouse CD3                                             | BUV395          | 17A2       | 1:100                      | BD                      |
| Anti-mouse CD8                                             | BV711           | 53-6.7     | 1:100                      | Biolegend               |
| Anti-mouse CD4                                             | BV510           | RM4-5      | 1:100                      | Biolegend               |
| Anti-mouse Gr1                                             | Alexa Fluor 700 | RB6-8C5    | 1:100                      | Biolegend               |
| Anti-mouse NKp46                                           | PE              | 29A1.4     | 1:100                      | BD                      |
| Anti-mouse NK1.1                                           | BV605           | PK136      | 1:100                      | Biolegend               |
| Anti-mouse PDCA1                                           | BV750           | 927        | 1:100                      | BD                      |
| Anti-mouse CD11c                                           | PC/CY7          | N418       | 1:100                      | Biolegend               |
| Anti-mouse CD27                                            | BV650           | LG.3A10    | 1:100                      | Biolegend               |
| Anti-mouse CD11b                                           | FITC            | M1/70      | 1:100                      | Biolegend               |
| Anti-mouse I-Ab                                            | BUV805          | 25-9-17    | 1:100                      | BD                      |
| Ghost-Dye UV450                                            | NA              | NA         | 1:100                      | Tonbo Biosciences       |
| CSFE-Violet                                                | NA              | NA         | 2.5 $\mu$ M                | ThermoFisher Scientific |
| Perm Buffer IV 10X                                         | NA              | NA         | 0.5X                       | BD                      |
| BD Cytofix/Cytoperm fixation and permeabilization solution | NA              | NA         | 1X                         | BD                      |
| 7AAD                                                       | NA              | NA         | 1:100                      | Biolegend               |
| Fc block                                                   | NA              | NA         | 1:100                      | BD                      |
| eBioscience™ Protein Transport Inhibitor Cocktail (500X)   | NA              | NA         | 1X                         | ThermoFisher SCIENTIFIC |
| ODN2395                                                    | NA              | NA         | 3 $\mu$ M                  | InvivoGen               |

**Table S3:** *Reagents and antibodies used for mass cytometry*

| <b>Metal label</b> | <b>Target</b> | <b>Clone</b> | <b>Source</b>     | <b>Concentration (µg/mL)</b> | <b>Titre (µg/mL)</b> |
|--------------------|---------------|--------------|-------------------|------------------------------|----------------------|
| 141Pr              | HLA-DR        | L243         | Custom, Biolegend | 425                          | 2                    |
| 145Nd              | CD4           | RPA-T4       | Fluidigm          | 500                          | 5                    |
| 146Nd              | CD8           | RPA-T8       | Fluidigm          | 500                          | 5                    |
| 147Sm              | CD20          | 2H7          | Fluidigm          | 500                          | 5                    |
| 153Eu              | CD45RA        | HI100        | Fluidigm          | 500                          | 5                    |
| 154Sm              | CD3           | UCHT1        | Fluidigm          | 500                          | 5                    |
| 158Gd              | CD33          | WM53         | Fluidigm          | 500                          | 5                    |
| 160Gd              | CD14          | M5E2         | Fluidigm          | 500                          | 5                    |
| 166Er              | IL-2          | MQ1-17h12    | Fluidigm          | 500                          | 5                    |
| 167Er              | CD27          | L128         | Fluidigm          | 500                          | 5                    |
| 176Yb              | CD56          | NCAM16.2     | Fluidigm          | 500                          | 5                    |
| 209Bi              | CD16          | 3G8          | Fluidigm          | 500                          | 5                    |

**Table S4:** Primers used for qPCR analysis

| Name                   | Forward                 | Reverse                  |
|------------------------|-------------------------|--------------------------|
| IFN $\alpha$ R1        | CGAGGCGAAGTGGTTAAAAG    | ACGGATCAACCTCATTCCAC     |
| IFN $\alpha$ R2        | ACCGTCTGCTTTTGATGGGT    | AGAGGGTGTAGTTAGCGGGT     |
| IFN $\beta$ 1          | GCCTTTGCCATCCAAGAGATGC  | ACACTGTCTGCTGGTGGAGTT    |
| IFN $\alpha$ 1         | GGATGTGACCTTCCCTCAGACTC | ACCTTCTCCTGCGGGAATCCAA   |
| IFN $\alpha$ 2         | ATCCAGAAGGCTCAAGCCATCC  | GGAGGGTTGTATTCCAAGCAGC   |
| STAT1                  | TGGTCAAATTGCAAGAGCTG    | CAGACTTCCGTTGGTGGATT     |
| MX1                    | CTCTGGGTGTGGAGCAGGAC    | GAGGGCCACTCCAGACAGTG     |
| IL-15                  | GTAGGTCTCCCTAAAACAGAGGC | TCCAGGAGAAAGCAGTTCATTGC  |
| OAS1                   | GAGGTGGAGTTTGATGTGCTGC  | GTGAAGCAGGTAGAGAACTCGC   |
| Ubiquitin              | AGCCCAGTGTTACCACCAAG    | ACCCAAGAACAAGCACAAGG     |
| IL-15 (Human)          | AACAGAAGCCAAGTGGTGAATG  | CTCCAAGAGAAAGCACTTCATTGC |
| MYC (Human)            | CTGCGACGAGGAGGAGAACT    | GGCAGCAGCTCGAATTTCTT     |
| IFN $\alpha$ 1 (Human) | TTGACTCATACACCAGGTCACG  | AGCATGGTCATAGTTATAGCAGGG |
| IFN $\alpha$ 2 (Human) | TGGGCTGTGATCTGCCTCAAAC  | CAGCCTTTTGGAACTGGTTGCC   |
| IFN $\beta$ 1 (Human)  | CTTGGATTCTACAAAGAAGCAGC | TCCTCCTTCTGGAAGTCTGCA    |
| STAT1 (Human)          | CCGTTTTTCATGACCTCCTGT   | TGAATATCCCCGACTGAGC      |
| MX1 (Human)            | GGCTGTTTACCAGACTCCGACA  | CACAAAGCCTGGCAGCTCTCTA   |
| Ubiquitin (Human)      | GCCGCACTCTTCTGACTACAAC  | ACCTCCAGAGTGATGGTCTTGC   |

**Table S5:** *Antibodies used for immunoblotting*

| <b>Name</b>                    | <b>Clone ID/<br/>Catalog No</b> | <b>Specificity</b> | <b>Dilution/<br/>Concentration</b> | <b>Source</b>             |
|--------------------------------|---------------------------------|--------------------|------------------------------------|---------------------------|
| Anti- $\beta$ -Actin           | 8H10D10                         | Mouse/Human        | 1:1000                             | Cell Signaling Technology |
| Anti-cMYC                      | D84C12                          | Mouse/Human        | 1:500                              | Cell Signaling Technology |
| Anti-phospho STAT1<br>(Ser727) | #9177S                          | Mouse/Human        | 1:500                              | Cell Signaling Technology |
| Anti-STAT1                     | #9172S                          | Mouse/Human        | 1:1000                             | Cell Signaling Technology |
| Anti-MX1                       | D3W71                           | Mouse/Human        | 1:1000                             | Cell Signaling Technology |
