# Supplementary figures and images for: Intrinsic suppression of type I interferon production underlies the therapeutic efficacy of IL-15-producing natural killer cells in B-cell acute lymphoblastic leukemia
Source: PubMed Central journal article supplement — J Immunother Cancer. 2023 May 22;11(5):e006649. doi: 10.1136/jitc-2022-006649 (PMC10231005; doi:10.1136/jitc-2022-006649), 2023-05-22

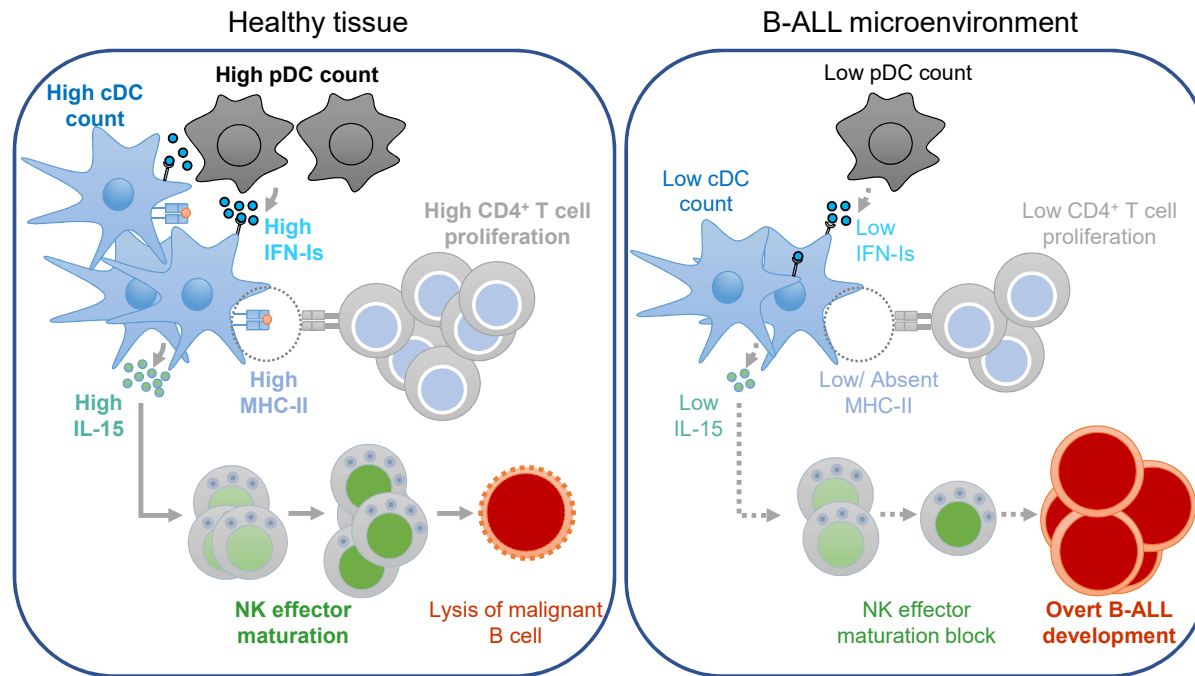

Supplement: jitc-2022-006649supp002.pdf [file jitc-2022-006649supp002.pdf]
